# Supplementary material for: Parallel generation of extra advanced glycation end-products during co-digestion of whey proteins and α-dicarbonyls in a simulated gastrointestinal model
Source: Royal Society of Chemistry journal article supplement (doi:10.1039/d2fo03000d), 2023-01-01

**Supplementary Figure S1.** Detailed information of the retention time and MS/MS parameters of  $\alpha$ -DCs and AGE standards.

| Analyte       | Retention time<br>(min) | Internal standard | Precursor ion<br>(m/z) | Quantitation ion<br>(m/z) | Collision energy<br>(eV) | Declustering<br>potential (V) |
|---------------|-------------------------|-------------------|------------------------|---------------------------|--------------------------|-------------------------------|
| CML           | 3.3                     | CML-d4            | 205.0                  | 130.0                     | 16.0                     | 80                            |
| CEL           | 3.4                     | CEL-d4            | 219.0                  | 130.0                     | 17.0                     | 90                            |
| Pyrraline     | 9.8                     | GOLD-15N2         | 255.0                  | 174.9                     | 17.0                     | 60                            |
| Pentosidine   | 5.5                     | GOLD-15N2         | 380.2                  | 251.0                     | 32.0                     | 100                           |
| MG-H1/3       | 3.8                     | MG-H1-d3          | 229.1                  | 114.1                     | 20.0                     | 70                            |
| MG-H2         | 3.7                     | MG-H1-d3          | 229.1                  | 116.0                     | 19.0                     | 80                            |
| Argpyrimidine | 6.3                     | GOLD-15N2         | 255.1                  | 139.7                     | 22.0                     | 70                            |
| G-H1          | 3.4                     | G-H1-13C2         | 215.2                  | 116.1                     | 19.0                     | 100                           |
| GOLD          | 3.4                     | GOLD-15N2         | 328.2                  | 130.1                     | 31.0                     | 100                           |
| MOLD          | 3.4                     | GOLD-15N2         | 342.3                  | 297.1                     | 30.0                     | 100                           |
| CML-d4        | 3.3                     | /                 | 209.0                  | 88.0                      | 26.0                     | 90                            |
| CEL-d4        | 3.4                     | /                 | 223.0                  | 134.0                     | 18.0                     | 90                            |
| GOLD-15N2     | 3.4                     | /                 | 330.2                  | 284.2                     | 28.0                     | 100                           |
| MG-H1-d3      | 3.8                     | /                 | 232.2                  | 70.0                      | 32.0                     | 80                            |
| G-H1-13C2     | 3.4                     | /                 | 217.1                  | 153.9                     | 18.0                     | 35                            |
| MGO           | 3.55                    | 2,3-DQX           | 145.0                  | 35.0                      | 28.0                     | 77                            |
| GO            | 3.79                    | 2,3-DQX           | 131.0                  | 35.0                      | 28.0                     | 77                            |

**Supplementary Figure S2.** Generation of four specific fluorescent AGEs in WPI co-digested with  $\alpha$ -DCs following gastric and subsequent intestinal digestion: (a) vesperlysine, (b) pentosidine, (c) argpyrimidine, (d) crossline. Values represent the mean  $\pm$  SD from three independent replicates. AGEs, advanced glycation end-products; WPI, whey protein isolate;  $\alpha$ -DC,  $\alpha$ -dicarbonyl compounds; GO, glyoxal; MGO, methylglyoxal; (M)GO-L/M/H, WPI co-digested with low, medium, or high nmol of (M)GO, *et cetera*.

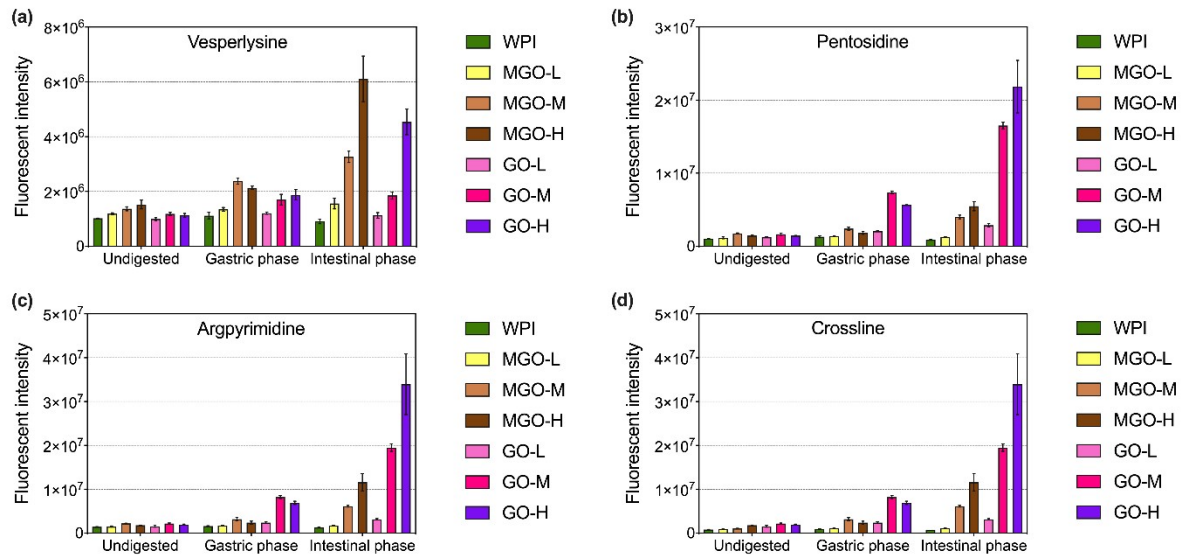

**Supplementary Figure S3.** Generation of fluorescent AGEs in systems containing  $\alpha$ -DCs and enzymes without WPI. AGEs, advanced glycation end-products; WPI, whey protein isolate;  $\alpha$ -DC,  $\alpha$ -dicarbonyl compounds; GO, glyoxal; MGO, methylglyoxal.

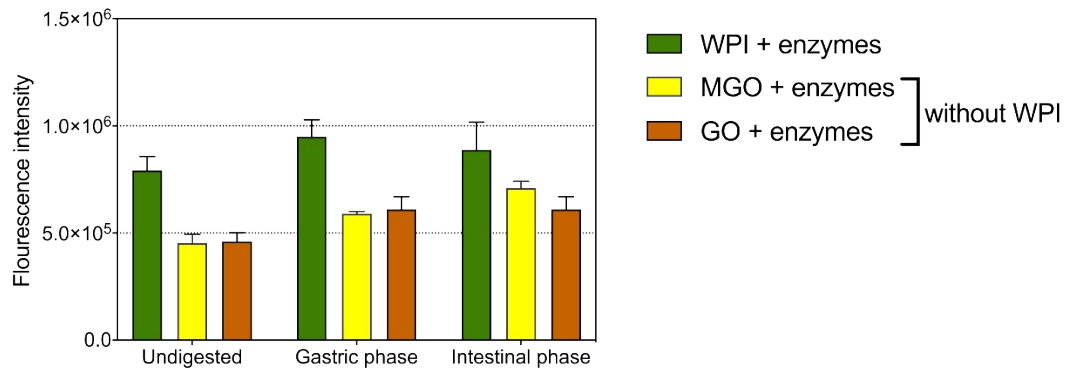

**Supplementary Figure S4.** Quantification of 10 specific AGEs in WPI co-digested with different  $\alpha$ -DCs following GI digestion. Values represent the mean  $\pm$  SD from two independent replicates. Different letters indicate statistical difference at  $p < 0.05$  (Tukey's test). AGEs, advanced glycation end-products; WPI, whey protein isolate;  $\alpha$ -DC,  $\alpha$ -dicarbonyl compounds; GO, glyoxal; MGO, methylglyoxal; GO-L/M/H, GO-Low/Medium/High; (M)GO-L/M/H, WPI co-digested with low, medium, or high nmol of (M)GO, *et cetera*; ND, not-detected.

|                  |         | CML               | CEL               | MG-H1/3           | MG-H2             | Argpyrimidine      | G-H1               | GOLD              | MOLD                | Total AGEs           |  |
|------------------|---------|-------------------|-------------------|-------------------|-------------------|--------------------|--------------------|-------------------|---------------------|----------------------|--|
| Gastric phase    | Control | 0.08 $\pm$ 0.0008 | 0.48 $\pm$ 0.0173 | 0.18 $\pm$ 0.0119 | 0.08 $\pm$ 0.0040 | 0.42 $\pm$ 0.0085  | 0.08 $\pm$ 0.0024  |                   | 1.32 $\pm$ 0.0390 g |                      |  |
|                  | GO-L    | 0.22 $\pm$ 0.0111 | 0.52 $\pm$ 0.0094 | 0.12 $\pm$ 0.0008 | 0.08 $\pm$ 0.0009 | 2.22 $\pm$ 0.0202  | 0.16 $\pm$ 0.0070  | 0.08 $\pm$ 0.0016 | 3.40 $\pm$ 0.0494 f |                      |  |
|                  | GO-M    | 0.08 $\pm$ 0.0009 | 0.28 $\pm$ 0.0023 | 0.04 $\pm$ 0.0010 | 0.08 $\pm$ 0.0016 | 3.90 $\pm$ 0.0260  | 0.08 $\pm$ 0.0028  | 0.08 $\pm$ 0.0035 | 4.54 $\pm$ 0.0337 e |                      |  |
|                  | GO-H    | 0.12 $\pm$ 0.0028 | 0.20 $\pm$ 0.0084 | 0.46 $\pm$ 0.0087 | 0.12 $\pm$ 0.0021 | 0.06 $\pm$ 0.0033  | 51.3 $\pm$ 0.7128  | 0.44 $\pm$ 0.0077 | 52.7 $\pm$ 0.7228 b |                      |  |
|                  | MGO-L   | 0.08 $\pm$ 0.0020 | 3.82 $\pm$ 0.0772 | 2.80 $\pm$ 0.0630 | 0.22 $\pm$ 0.0250 | 1.20 $\pm$ 0.0625  |                    | 0.08 $\pm$ 0.0024 | 8.20 $\pm$ 0.2273 d |                      |  |
|                  | MGO-M   | 0.18 $\pm$ 0.0055 | 0.20 $\pm$ 0.0145 | 10.7 $\pm$ 0.0383 | 8.62 $\pm$ 0.0206 | 1.94 $\pm$ 0.0316  | 0.70 $\pm$ 0.0201  | 0.08 $\pm$ 0.0024 | 1.04 $\pm$ 0.0118   | 23.4 $\pm$ 0.0221 e  |  |
|                  | MGO-H   | 0.80 $\pm$ 0.0064 | 0.24 $\pm$ 0.0069 | 22.9 $\pm$ 0.0291 | 32.4 $\pm$ 0.0237 | 1.28 $\pm$ 0.0691  | 1.52 $\pm$ 0.0102  | 0.06 $\pm$ 0.0138 | 4.20 $\pm$ 0.0226   | 63.4 $\pm$ 0.0304 a  |  |
|                  | Control | 0.28 $\pm$ 0.0028 | 0.60 $\pm$ 0.0030 | 0.16 $\pm$ 0.0045 | 0.08 $\pm$ 0.0031 | 0.56 $\pm$ 0.0109  | 0.08 $\pm$ 0.0034  |                   | 1.76 $\pm$ 0.0285 E |                      |  |
|                  | GO-L    | 0.04 $\pm$ 0.0001 | 0.40 $\pm$ 0.0072 | 0.12 $\pm$ 0.0030 |                   | 3.68 $\pm$ 0.1576  |                    | 0.08 $\pm$ 0.0006 | 4.32 $\pm$ 0.1529 E |                      |  |
|                  | GO-M    | 0.08 $\pm$ 0.0016 | 1.08 $\pm$ 0.0146 | 0.28 $\pm$ 0.0057 | 0.06 $\pm$ 0.0031 | 29.3 $\pm$ 0.6215  |                    | 0.08 $\pm$ 0.0033 | 30.9 $\pm$ 0.6409 D |                      |  |
| Intestinal phase | GO-H    | 0.12 $\pm$ 0.0023 | 0.20 $\pm$ 0.0151 | 0.46 $\pm$ 0.0186 | 0.20 $\pm$ 0.0073 | 0.08 $\pm$ 0.0009  | 127.5 $\pm$ 3.6098 | 0.94 $\pm$ 0.0204 | 0.08 $\pm$ 0.0008   | 129.5 $\pm$ 3.6751 B |  |
|                  | MGO-L   | 0.04 $\pm$ 0.0003 | 2.72 $\pm$ 0.0651 | 1.98 $\pm$ 0.0201 | 0.16 $\pm$ 0.0082 | 1.00 $\pm$ 0.0256  |                    | 0.12 $\pm$ 0.0024 | 6.02 $\pm$ 0.0069 E |                      |  |
|                  | MGO-M   | 0.16 $\pm$ 0.0026 | 0.36 $\pm$ 0.0155 | 10.5 $\pm$ 0.0617 | 7.44 $\pm$ 0.1190 | 18.5 $\pm$ 0.3461  | 1.46 $\pm$ 0.0376  | 0.08 $\pm$ 0.0011 | 0.44 $\pm$ 0.0170   | 38.9 $\pm$ 0.5984 C  |  |
|                  | MGO-H   | 0.26 $\pm$ 0.0106 | 0.32 $\pm$ 0.0024 | 54.1 $\pm$ 0.6629 | 47.9 $\pm$ 0.7322 | 133.2 $\pm$ 1.2265 | 1.20 $\pm$ 0.0111  | 0.40 $\pm$ 0.0136 | 6.44 $\pm$ 0.0670   | 243.7 $\pm$ 2.7262 A |  |
|                  |         |                   |                   |                   |                   |                    |                    |                   |                     |                      |  |

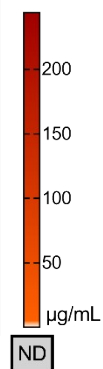

Supplement: d2fo03000d1.pdf [file d2fo03000d1.pdf]
